# Supplementary material for: Biomarkers after Controlled Inhalation Exposure to Exhaust from Hydrogenated Vegetable Oil (HVO)
Source: Int J Environ Res Public Health. 2021 Jun 16;18(12):6492. doi: 10.3390/ijerph18126492 (PMC8296316; doi:10.3390/ijerph18126492)
Supplement: Supplementary file 1 [file ijerph-18-06492-s001.zip › ijerph-1232560-supplementary.pdf]

**Table S1: Summary of the average exposure concentrations and particle characteristics.** Full details of exposures and characterization have been described earlier for HVO exhaust [11] and petroleum diesel exhaust [12].

|                                            | HVO exposure study [11] |                      |                    |                       | Diesel exposure study [12] |                                               |
|--------------------------------------------|-------------------------|----------------------|--------------------|-----------------------|----------------------------|-----------------------------------------------|
|                                            | FA                      | Salt <sub>PM</sub>   | HVO <sub>NOx</sub> | HVO <sub>PM+NOx</sub> | FA                         | Diesel <sub>PM</sub>                          |
| PM <sub>1</sub> (µg/m <sup>3</sup> )       | <1 <sup>a</sup>         | 85 ± 13 <sup>a</sup> | <1 <sup>a</sup>    | 93 ± 13 <sup>a</sup>  | 2 ± 2 <sup>b</sup>         | 276 ± 27 <sup>b</sup>                         |
| Elemental carbon (EC, µg/m <sup>3</sup> )  | <1                      | <1                   | <1                 | 54 ± 6                | <1                         | 215 ± 37                                      |
| NO (ppm)                                   | <0.001                  | <0.001               | 2.0 ± 0.1          | 3.4 ± 0.1             | <0.003                     | 9.8 ± 1.0                                     |
| NO <sub>2</sub> (ppm)                      | <0.001                  | <0.001               | 0.70 ± 0.04        | 0.57 ± 0.04           | <0.002                     | 1.3 ± 0.4                                     |
| Particle phase PAHs (ng/m <sup>3</sup> )   | <LOD                    | <LOD                 | 0.3 ± 0.7          | 43 ± 3                | <LOD                       | 60 ± 12                                       |
| Gas phase PAHs (ng/m <sup>3</sup> )        | 116 ± 29                | 96 ± 47              | 97 ± 11            | 850 ± 48              | <LOD                       | 7.5 x 10 <sup>3</sup> ± 0.2 x 10 <sup>3</sup> |
| Sum BTEX <sup>c</sup> (µg/m <sup>3</sup> ) | 1.3 ± 0.1               | 1.3 ± 0.1            | 1.7 ± 0.3          | 7.9 ± 2.5             | <LOD                       | 710 ± 14                                      |

<sup>a</sup>Gravimetric mass analysis; <sup>a</sup>large uncertainties at low mass concentrations. The mass concentrations were in the range of the blank filters (-1 ± 3 µg).

<sup>b</sup>Mass of PM<sub>1</sub> based on TEOM measurements.

<sup>c</sup>Benzene, toluene, ethyl benzene, *m+p* xylene, and *o*-xylene were included in the analysis.

**Table S2: Analytical details for quantification of urinary biomarkers.** The table includes retention time (RT), quantitative ion transition, collision energies (CE) in electron volt (eV), and limit of detection (LOD). Method details are described in Material and Methods.

| Group                 | Biomarker  | RT   | Transition | CE (eV) | Internal Standard                     | RT   | Internal Standard | CE (eV) | LOD  |
|-----------------------|------------|------|------------|---------|---------------------------------------|------|-------------------|---------|------|
| PAHs                  | 2-Nap      | 6.84 | 143 → 115  | -34     | D <sub>7</sub> -2-Nap                 | 6.79 | 150 → 122         | -34     | 0.04 |
|                       | 2,3-OH-Flu | 7.52 | 181 → 180  | -30     | D <sub>8</sub> -2,3-OH-Flu            | 7.48 | 190 → 188         | -30     | 0.07 |
|                       | 2,3-OH-Phe | 7.77 | 193 → 165  | -41     | D <sub>9</sub> -2,3-OH-Phe            | 7.68 | 202 → 174         | -41     | 0.07 |
|                       | 1-OH-Phe   | 7.89 | 193 → 165  | -41     | D <sub>9</sub> -1-OH-Phe              | 7.85 | 202 → 174         | -41     | 0.07 |
|                       | 4-OH-Phe   | 8.01 | 193 → 165  | -41     | D <sub>9</sub> -4-OH-Phe              | 7.95 | 202 → 174         | -41     | 0.07 |
|                       | 1-OH-Pyr   | 8.29 | 217 → 189  | -50     | D <sub>9</sub> -1-OH-Pyr              | 8.24 | 226 → 198         | -50     | 0.07 |
| other VOCs            | 4-MHA      | 2.86 | 192 → 91   | -17     | D <sub>7</sub> -4-MHA                 | 2.84 | 199 → 98          | -17     | 1.52 |
|                       | BMA        | 3.72 | 252 → 123  | -20     | D <sub>4</sub> -BMA                   | 3.73 | 257 → 128         | -20     | 0.03 |
|                       | PMA        | 3.65 | 238 → 109  | -22     | D <sub>5</sub> -PMA                   | 3.66 | 243 → 114         | -22     | 0.02 |
|                       | 4-MU       | 3.83 | 175 → 147  | -30     | <sup>13</sup> C <sub>4</sub> -4-MU    | 3.82 | 179 → 150         | -30     | 0.07 |
|                       | 3-HPMA     | 2.41 | 220 → 91   | -17     | D <sub>6</sub> -3-HPMA                | 2.40 | 226 → 97          | -17     | 0.08 |
| ox stress<br>Inflamm. | 4-HNE-MA   | 2.96 | 318 → 171  | -28     |                                       |      |                   |         |      |
|                       | 8-oxodG    | 7.52 | 284 → 168  | 17      | <sup>15</sup> N <sub>5</sub> -8-oxodG | 7.48 | 289 → 173         | 17      | 0.12 |

**Table S3: Concentrations of urinary biomarkers after exposure to HVO and petroleum diesel exhaust.** Average and standard deviation of urinary metabolites (density adjusted) from 18 volunteers after exposure to: filtered air (FA), aerosolized dry NaCl (Salt<sub>PM</sub>), HVO exhaust from a modern non-road vehicle with exhaust aftertreatment (HVO<sub>NOx</sub>) and without exhaust aftertreatment (HVO<sub>PM+NOx</sub>), as well as petroleum diesel exhaust (Diesel<sub>PM</sub>). Statistical analysis was performed using Wilcoxon signed rank test (\*P < 0.05, \*\*P < 0.01, \*\*\*P < 0.001, different from time point 0 h (before exposure)).

| Group                     | Biomarker  | Time point | FA             | Salt <sub>PM</sub> | HVO <sub>NOx</sub> | HVO <sub>PM+NOx</sub> | Diesel <sub>PM</sub> |
|---------------------------|------------|------------|----------------|--------------------|--------------------|-----------------------|----------------------|
|                           |            |            | average ± stdv |                    |                    |                       |                      |
| PAHs                      | 2-Nap      | 0 h        | 3.5 ± 3.2      | 3.6 ± 3.1          | 2.7 ± 2.5          | 2.8 ± 2.6             | 3.4 ± 3.9            |
|                           |            | 3 h        | 2.3 ± 2.2      | 2.1 ± 1.6          | 1.6 ± 1.0          | 1.8 ± 1.5             | 2.7 ± 3.4            |
|                           |            | 24 h       | 2.8 ± 2.6      | 2.8 ± 1.7          | 2.8 ± 2.2          | 3.9 ± 7.1             | 3.1 ± 2.9            |
|                           | 2,3-OH-Flu | 0 h        | 0.2 ± 0.2      | 0.2 ± 0.4          | 0.1 ± 0.1          | 0.2 ± 0.1             | 0.2 ± 0.3            |
|                           |            | 3 h        | 0.2 ± 0.1      | 0.1 ± 0.1          | 0.1 ± 0.1          | 0.1 ± 0.1             | 0.2 ± 0.1            |
|                           |            | 24 h       | 0.2 ± 0.1      | 0.1 ± 0.1          | 0.2 ± 0.1          | 0.1 ± 0.1             | 0.2 ± 0.1            |
|                           | 2,3-OH-Phe | 0 h        | 0.2 ± 0.2      | 0.2 ± 0.2          | 0.1 ± 0.1          | 0.2 ± 0.2             | 0.2 ± 0.2            |
|                           |            | 3 h        | 0.2 ± 0.1      | 0.1 ± 0.1          | 0.1 ± 0.1          | 0.1 ± 0.1             | 0.1 ± 0.1            |
|                           |            | 24 h       | 0.2 ± 0.2      | 0.2 ± 0.1          | 0.2 ± 0.2          | 0.1 ± 0.1             | 0.2 ± 0.2            |
|                           | 1-OH-Phe   | 0 h        | 0.3 ± 0.2      | 0.4 ± 0.5          | 0.2 ± 0.2          | 0.2 ± 0.3             | 0.3 ± 0.2            |
|                           |            | 3 h        | 0.2 ± 0.1      | 0.3 ± 0.4          | 0.2 ± 0.2          | 0.2 ± 0.2             | 0.3 ± 0.2            |
|                           |            | 24 h       | 0.3 ± 0.3      | 0.4 ± 0.5          | 0.3 ± 0.3          | 0.2 ± 0.1             | 0.3 ± 0.2            |
|                           | 4-OH-Phe   | 0 h        | 0.0 ± 0.0      | 0.0 ± 0.1          | 0.0 ± 0.1          | 0.0 ± 0.0             | 0.0 ± 0.0            |
|                           |            | 3 h        | 0.0 ± 0.0      | 0.0 ± 0.0          | 0.0 ± 0.0          | 0.0 ± 0.0             | 0.0 ± 0.0            |
|                           |            | 24 h       | 0.0 ± 0.0      | 0.0 ± 0.1          | 0.0 ± 0.0          | 0.0 ± 0.0             | 0.0 ± 0.0            |
|                           | 1-OH-Pyr   | 0 h        | 0.1 ± 0.0      | 0.1 ± 0.1          | 0.1 ± 0.0          | 0.1 ± 0.0             | 0.1 ± 0.1            |
|                           |            | 3 h        | 0.1 ± 0.0      | 0.0 ± 0.0          | 0.0 ± 0.0          | 0.0 ± 0.0             | 0.1 ± 0.0            |
|                           |            | 24 h       | 0.1 ± 0.0      | 0.1 ± 0.0          | 0.1 ± 0.1          | 0.1 ± 0.0             | 0.1 ± 0.1            |
| other VOCs                | 4-MHA      | 0 h        | 59 ± 28        | 78 ± 177           | 44 ± 24            | 31 ± 11               | 79 ± 55              |
|                           |            | 3 h        | 34 ± 13***     | 57 ± 75            | 27 ± 14***         | 23 ± 8.0*             | 118 ± 64***          |
|                           |            | 24 h       | 51 ± 21        | 63 ± 113           | 56 ± 64            | 36 ± 30               | 77 ± 74              |
|                           | BMA        | 0 h        | 8.8 ± 5.8      | 11 ± 16            | 8.9 ± 6.5          | 8.1 ± 6.4             | 10 ± 6.9             |
|                           |            | 3 h        | 7.2 ± 6.0***   | 6.1 ± 4.2**        | 5.3 ± 4.4***       | 5.2 ± 2.9**           | 9.5 ± 9.3            |
|                           |            | 24 h       | 9.5 ± 5.7      | 9.6 ± 7.8          | 9.7 ± 7.3          | 7.1 ± 3.5             | 12 ± 7.6             |
|                           | PMA        | 0 h        | 0.2 ± 0.2      | 0.1 ± 0.1          | 0.1 ± 0.1          | 0.1 ± 0.0             | 0.1 ± 0.0            |
|                           |            | 3 h        | 0.1 ± 0.1*     | 0.2 ± 0.3          | 0.0 ± 0.1***       | 0.0 ± 0.0             | 0.0 ± 0.0***         |
|                           |            | 24 h       | 0.2 ± 0.2      | 0.2 ± 0.2          | 0.1 ± 0.1          | 0.1 ± 0.1*            | 0.1 ± 0.0            |
|                           | 4-MU       | 0 h        | 0.4 ± 0.5      | 1.0 ± 1.4          | 0.5 ± 0.8          | 0.9 ± 1.6             | 0.7 ± 0.9            |
|                           |            | 3 h        | 0.3 ± 0.3      | 1.0 ± 1.1          | 0.3 ± 0.3          | 0.6 ± 1.0             | 0.4 ± 0.4            |
|                           |            | 24 h       | 0.6 ± 1.0      | 1.6 ± 1.8          | 0.5 ± 0.5          | 0.7 ± 1.0             | 0.5 ± 0.5            |
|                           | 3-HMPA     | 0 h        | 1564 ± 1165    | 1281 ± 1202        | 1400 ± 957         | 911 ± 618             | 958 ± 842            |
|                           |            | 3 h        | 832 ± 838**    | 700 ± 482*         | 649 ± 612***       | 650 ± 371*            | 533 ± 225***         |
|                           |            | 24 h       | 1307 ± 969     | 1385 ± 906         | 1073 ± 558         | 1366 ± 567*           | 958 ± 622            |
| ox. Stress / inflammation | 4-HNE-MA   | 0 h        | 65 ± 76        | 68 ± 70            | 44 ± 36            | 64 ± 71               | 9.1 ± 10             |
|                           |            | 3 h        | 70 ± 44        | 96 ± 62            | 61 ± 35            | 75 ± 37               | 7.7 ± 5.3            |
|                           |            | 24 h       | 58 ± 44        | 56 ± 56            | 57 ± 52            | 141 ± 103***          | 10 ± 8.2             |
|                           | 8-oxodG    | 0 h        | 8.2 ± 3.8      | 9.0 ± 3.6          | 8.9 ± 3.8          | 8.2 ± 3.6             | 7.7 ± 2.6            |
|                           |            | 3 h        | 7.0 ± 2.6      | 8.0 ± 3.6          | 7.6 ± 3.1          | 7.1 ± 2.8             | 6.7 ± 2.3            |
|                           |            | 24 h       | 8.5 ± 3.2      | 8.9 ± 3.2          | 8.7 ± 4.0          | 7.8 ± 3.0             | 7.5 ± 2.1            |

**Table S4: Total excretion of biomarkers after different exposure scenarios.**

Total excretion of urinary biomarkers, as calculated as area under the excretion curve (AUC), after exposure to filtered air (FA), aerosolized dry NaCl (Salt<sub>PM</sub>), HVO exhaust from a modern non-road vehicle with aftertreatment system (HVO<sub>NOx</sub>) and without exhaust aftertreatment (HVO<sub>PM+NOx</sub>). Shown are average and median values, as well as 25<sup>th</sup>-75<sup>th</sup> percentile, standard deviation (SD) and coefficient of variation (CV). Statistical analysis was performed using Mann-Whitney U test (no significant difference to FA were observed,  $P < 0.05$ ).

|          | Exposure              | Average<br>[µg*min/mL] | Median<br>[µg*min/mL] | 25th percentile<br>[µg*min/mL] | 75th percentile<br>[µg*min/mL] | SD<br>[µg*min/mL] | CV [%] |
|----------|-----------------------|------------------------|-----------------------|--------------------------------|--------------------------------|-------------------|--------|
| 4-HMA    | FA                    | 147                    | 66                    | 50                             | 76                             | 351               | 239    |
|          | Salt <sub>PM</sub>    | 101                    | 51                    | 36                             | 78                             | 188               | 187    |
|          | HVO <sub>NOx</sub>    | 56                     | 51                    | 33                             | 59                             | 42                | 75     |
|          | HVO <sub>PM+NOx</sub> | 78                     | 42                    | 31                             | 50                             | 144               | 184    |
| BMA      | FA                    | 10                     | 11                    | 5,4                            | 12                             | 4,9               | 49     |
|          | Salt <sub>PM</sub>    | 9,8                    | 7,5                   | 5,4                            | 9,6                            | 7,7               | 78     |
|          | HVO <sub>NOx</sub>    | 8,8                    | 6,5                   | 4,6                            | 9,4                            | 6,8               | 77     |
|          | HVO <sub>PM+NOx</sub> | 8,0                    | 7,7                   | 6,1                            | 10                             | 3,4               | 42     |
| PMA      | FA                    | 0,3                    | 0,2                   | 0,1                            | 0,4                            | 0,2               | 81     |
|          | Salt <sub>PM</sub>    | 0,2                    | 0,1                   | 0,1                            | 0,2                            | 0,3               | 141    |
|          | HVO <sub>NOx</sub>    | 0,1                    | 0,1                   | 0,1                            | 0,1                            | 0,1               | 70     |
|          | HVO <sub>PM+NOx</sub> | 0,2                    | 0,2                   | 0,1                            | 0,2                            | 0,1               | 47     |
| 4-MU     | FA                    | 1,0                    | 0,6                   | 0,4                            | 1,2                            | 1,1               | 101    |
|          | Salt <sub>PM</sub>    | 1,8                    | 1,0                   | 0,6                            | 2,4                            | 1,9               | 102    |
|          | HVO <sub>NOx</sub>    | 0,8                    | 0,9                   | 0,5                            | 1,2                            | 0,5               | 58     |
|          | HVO <sub>PM+NOx</sub> | 1,1                    | 0,5                   | 0,3                            | 1,0                            | 1,4               | 126    |
| 3-HPMA   | FA                    | 1612                   | 1497                  | 1008                           | 1942                           | 782               | 49     |
|          | Salt <sub>PM</sub>    | 1472                   | 1268                  | 1111                           | 1684                           | 648               | 44     |
|          | HVO <sub>NOx</sub>    | 1472                   | 1189                  | 748                            | 1584                           | 1263              | 86     |
|          | HVO <sub>PM+NOx</sub> | 1600                   | 1657                  | 1167                           | 1866                           | 564               | 35     |
| 4-HNE-MA | FA                    | 181                    | 141                   | 88                             | 235                            | 130               | 72     |
|          | Salt <sub>PM</sub>    | 146                    | 110                   | 91                             | 183                            | 87                | 60     |
|          | HVO <sub>NOx</sub>    | 113                    | 112                   | 68                             | 133                            | 56                | 50     |
|          | HVO <sub>PM+NOx</sub> | 203                    | 192                   | 145                            | 211                            | 85                | 42     |
| 8-oxodG  | FA                    | 9,2                    | 8,6                   | 6,9                            | 11,1                           | 3,5               | 38     |
|          | Salt <sub>PM</sub>    | 8,9                    | 8,2                   | 6,9                            | 10,4                           | 2,7               | 30     |
|          | HVO <sub>NOx</sub>    | 9,4                    | 9,1                   | 7,5                            | 10,8                           | 3,7               | 39     |
|          | HVO <sub>PM+NOx</sub> | 9,0                    | 8,7                   | 7,5                            | 10,0                           | 2,4               | 27     |

**Table S5:** Total exposure and total excretion of VOCs. Compared were air concentrations of VOCs (nmol/m<sup>3</sup>), total inhaled amount of VOCs in the lung (nmol) during 3 h of exposure, and the total urinary excreted amount of VOC metabolites (nmol) up to 24 h after exposure. The sum of 2,3-hydroxyfluorenes is expressed as  $\Sigma$  OH-Flu; and the sum of 1,2,3,4-hydroxyphenanthrenes is expressed as  $\Sigma$  OH-Phe.

| Exposure              | Total Inhaled Amount (nmol)                     |                 |                 |          |          |         |         |
|-----------------------|-------------------------------------------------|-----------------|-----------------|----------|----------|---------|---------|
|                       | Nap                                             | Flu             | Phe             | Pyr      | p-xylene | toluene | benzene |
| FA                    | 1.1                                             | 0.2             | 0.1             | 0.0      | 11,97    | 8.5     | 3.6     |
| Salt <sub>PM</sub>    | 0.6                                             | 0.2             | 0.1             | 0.0      | 10,19    | 10.0    | 5.9     |
| HVO <sub>NOx</sub>    | 0.7                                             | 0.1             | 0.1             | 0.0      | 9,82     | 11.6    | 22.8    |
| HVO <sub>PM+NOx</sub> | 11.0                                            | 0.1             | 0.1             | 0.0      | 11,04    | 37.2    | 208     |
| Exposure              | Total Excreted Amount (nmol)                    |                 |                 |          |          |         |         |
|                       | 2-OH Nap                                        | $\Sigma$ OH-Flu | $\Sigma$ OH-Phe | 1-OH Pyr | 4-MHA    | BMA     | PMA     |
| FA                    | 23.1                                            | 1.25            | 1.85            | 0.35     | 783      | 43.4    | 1.4     |
| Salt <sub>PM</sub>    | 21.8                                            | 1.07            | 1.68            | 0.30     | 522      | 37.4    | 1.2     |
| HVO <sub>NOx</sub>    | 19.9                                            | 0.84            | 1.32            | 0.33     | 336      | 32.5    | 0.4     |
| HVO <sub>PM+NOx</sub> | 21.9                                            | 1.04            | 1.35            | 0.31     | 899      | 35.8    | 0.7     |
| Exposure              | % (Total Excreted Amount/ Total Inhaled Amount) |                 |                 |          |          |         |         |
|                       | Nap                                             | Flu             | Phe             | Pyr      | p-xylene | toluene | benzene |
| FA                    | 2176                                            | 740             | 1650            | n.d.     | 6536     | 512     | 38      |
| Salt <sub>PM</sub>    | 3670                                            | 634             | 1663            | n.d.     | 5124     | 374     | 20      |
| HVO <sub>NOx</sub>    | 2894                                            | 638             | 1565            | n.d.     | 3426     | 281     | 1.9     |
| HVO <sub>PM+NOx</sub> | 199                                             | 754             | 1005            | n.d.     | 8141     | 96.2    | 0.3     |
